# Supplementary material for: Highly sensitive fluorescent detection of glutathione and histidine based on the Cu(ii)-thiamine system
Source: Royal Society of Chemistry journal article supplement (doi:10.1039/c8an01201f), 2018-01-01
Supplement: c8an01201f1.pdf [file c8an01201f1.pdf]

**Highly sensitive fluorescent detection of glutathione and histidine based on the  
Cu(II)-thiamine system**

Pengjuan Ni,<sup>\*a</sup> Dafeng Jiang,<sup>b</sup> Chuanxia Chen,<sup>a</sup> Yuanyuan Jiang,<sup>a</sup> Yizhong Lu<sup>\*a</sup> and  
Zhenlu Zhao<sup>\*a</sup>

*<sup>a</sup>School of Materials Science and Engineering, University of Jinan, Jinan 250022,  
China*

*<sup>b</sup>Shandong Center for Disease Control and Prevention, Jinan 250014, China*

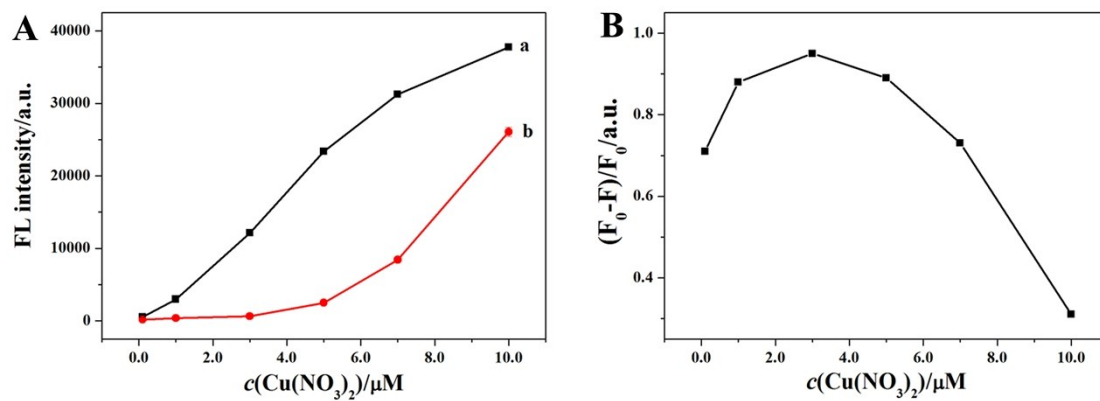

**Figure S1** (A) The maximum emission intensity of Cu(II)-GSH system in the absence (a) and presence (b) of GSH (5.0  $\mu\text{M}$ ) as a function of  $\text{Cu}(\text{NO}_3)_2$  concentration. (B) Effect of  $\text{Cu}(\text{NO}_3)_2$  concentration on  $(F_0-F)/F_0$ . NaOH concentration: 44 mM; TH concentration: 0.1 mM; incubation temperature: 20  $^\circ\text{C}$ ; incubation time: 15 min.

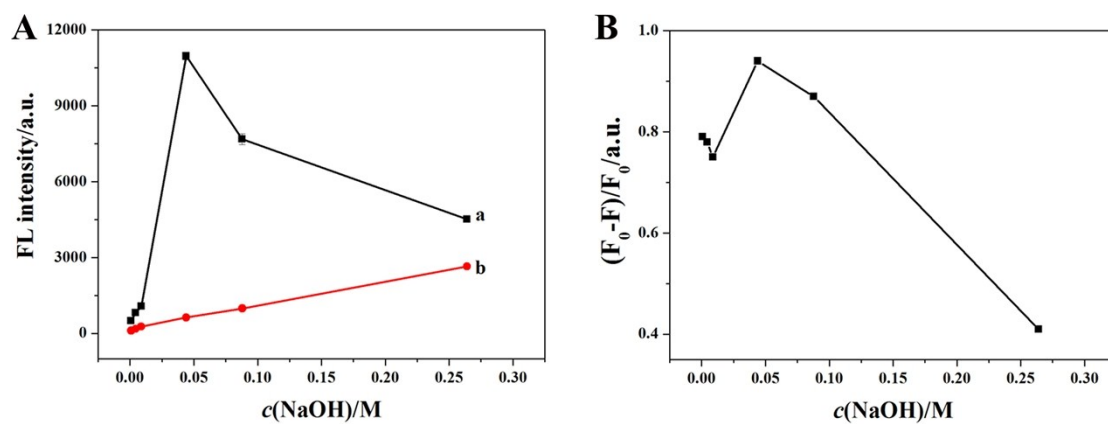

**Figure S2** (A) Effect of NaOH concentration on maximum emission intensity of Cu(II)-GSH system in the absence (a) and presence (b) of GSH (5.0 μM). (B) The plot of  $(F_0 - F)/F_0$  versus NaOH concentration. Cu<sup>2+</sup> concentration: 3.0 μM; TH concentration: 0.1 mM; incubation temperature: 20 °C; incubation time: 15 min.

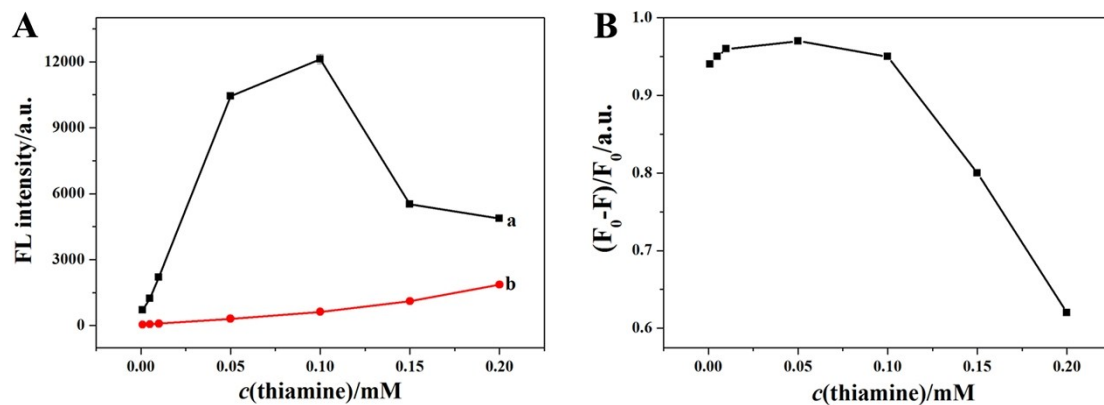

**Figure S3** (A) Impact of TH concentration on the maximum emission intensity of Cu(II)-GSH system in the absence (a) and presence (b) of GSH (5.0 μM). (B) The plot of  $(F_0 - F)/F_0$  versus TH concentration. NaOH concentration: 44 mM; Cu<sup>2+</sup> concentration: 3.0 μM; incubation temperature: 20 °C; incubation time: 15 min.

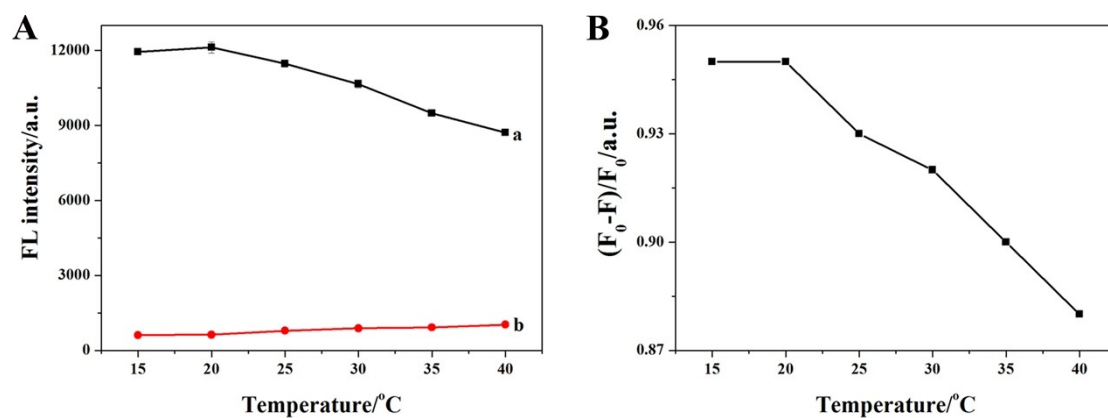

**Figure S4** (A) Variation of maximum emission intensity of Cu(II)-GSH system in the absence (a) and presence (b) of GSH (5.0 μM) as a function of incubation temperature. (B) Impact of incubation temperature on  $(F_0 - F)/F_0$ . NaOH concentration: 44 mM; Cu<sup>2+</sup> concentration: 3.0 μM; TH concentration: 0.1 mM; incubation time: 15 min.

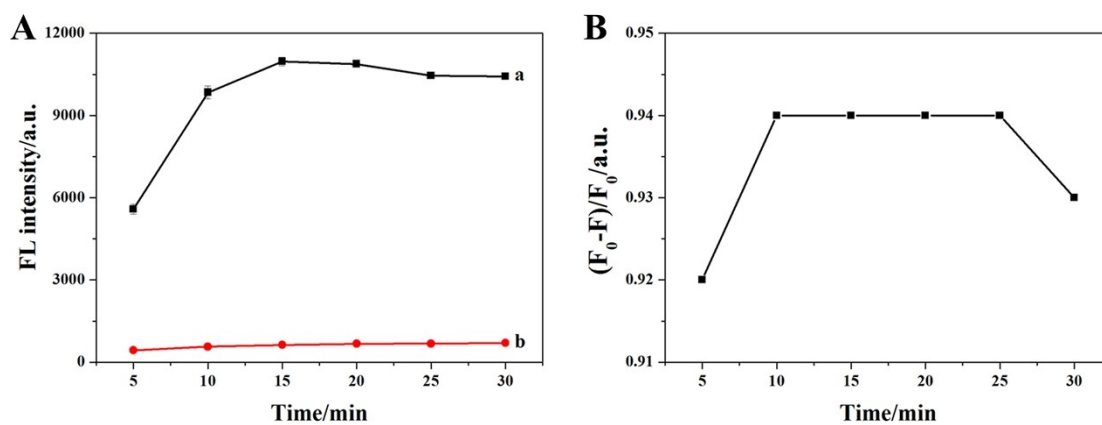

**Figure S5** (A) Variation of maximum emission intensity of Cu(II)-GSH system in the absence (a) and presence (b) of GSH (5.0  $\mu\text{M}$ ) as a function of incubation time. (B) Effect of incubation time on  $(F_0 - F)/F_0$ . NaOH concentration: 44 mM;  $\text{Cu}^{2+}$  concentration: 3.0  $\mu\text{M}$ ; TH concentration: 0.1 mM; incubation temperature: 20  $^\circ\text{C}$ .
